# Supplementary material for: Follicular dendritic cell dysfunction contributes to impaired antigen-specific humoral responses in sepsis-surviving mice
Source: JCI journal article supplement (doi:10.1172/jci146776), 2021-05-06
Supplement: sd1 [file 1]

## **Supplementary material**

**Follicular dendritic cell dysfunction contributes to impaired T cell-dependent antigen-specific humoral responses in sepsis-surviving mice.**

**Minakshi Rana<sup>1</sup>, Andrea La Bella<sup>1</sup>, Rivka Lederman<sup>1</sup>, Bruce T. Volpe<sup>2</sup>, Barbara Sherry<sup>3\*</sup>, Betty Diamond<sup>1\*</sup>**

<sup>1</sup>Center for Autoimmune, Musculoskeletal and Hematopoietic Diseases, The Feinstein Institutes for Medical Research, New York, USA; <sup>2</sup>Center for Biomedical Science, The Feinstein Institutes for Medical Research, New York, USA. <sup>3</sup>Center for Immunology and Inflammation, The Feinstein Institutes for Medical Research, New York, USA.

### **\*Correspondence**

Betty Diamond, The Feinstein Institutes for Medical Research, Center for Autoimmune, Musculoskeletal and Hematopoietic Diseases, 350 Community Dr., Manhasset, New York 11030; e-mail: bdiamond@northwell.edu; Phone: 516-562-3830, Fax: 516-562-2953

Barbara Sherry, The Feinstein Institutes for Medical Research, Center for Immunology and Inflammation, 350 Community Dr., Manhasset, New York 11030; e-mail: bsherry@northwell.edu; Phone: 516-562-3402, Fax: 516-562-1022

## Supplementary Figure 1

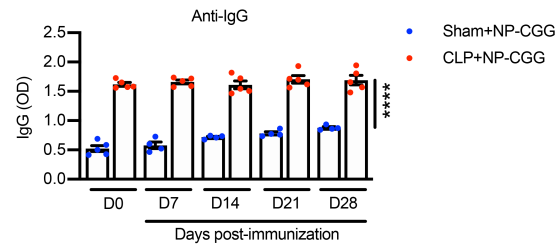

**Supplementary Figure 1.** Sham and CLP mice were immunized with NP-CGG in alum; single i.p. injection four-weeks post-surgery. Serum was analyzed for total anti-IgG (1:20000). Time-dependent response of total anti-IgG (n=4-5, Sham+NP-CGG; n=5, CLP+NP-CGG). Data represent mean  $\pm$  SEM from one of two independent experiments. Sham+NP-CGG vs. CLP+NP-CGG \*\*\*\* $P < 0.0001$  (Mixed-effects model (REML)).

## Supplementary Figure 2

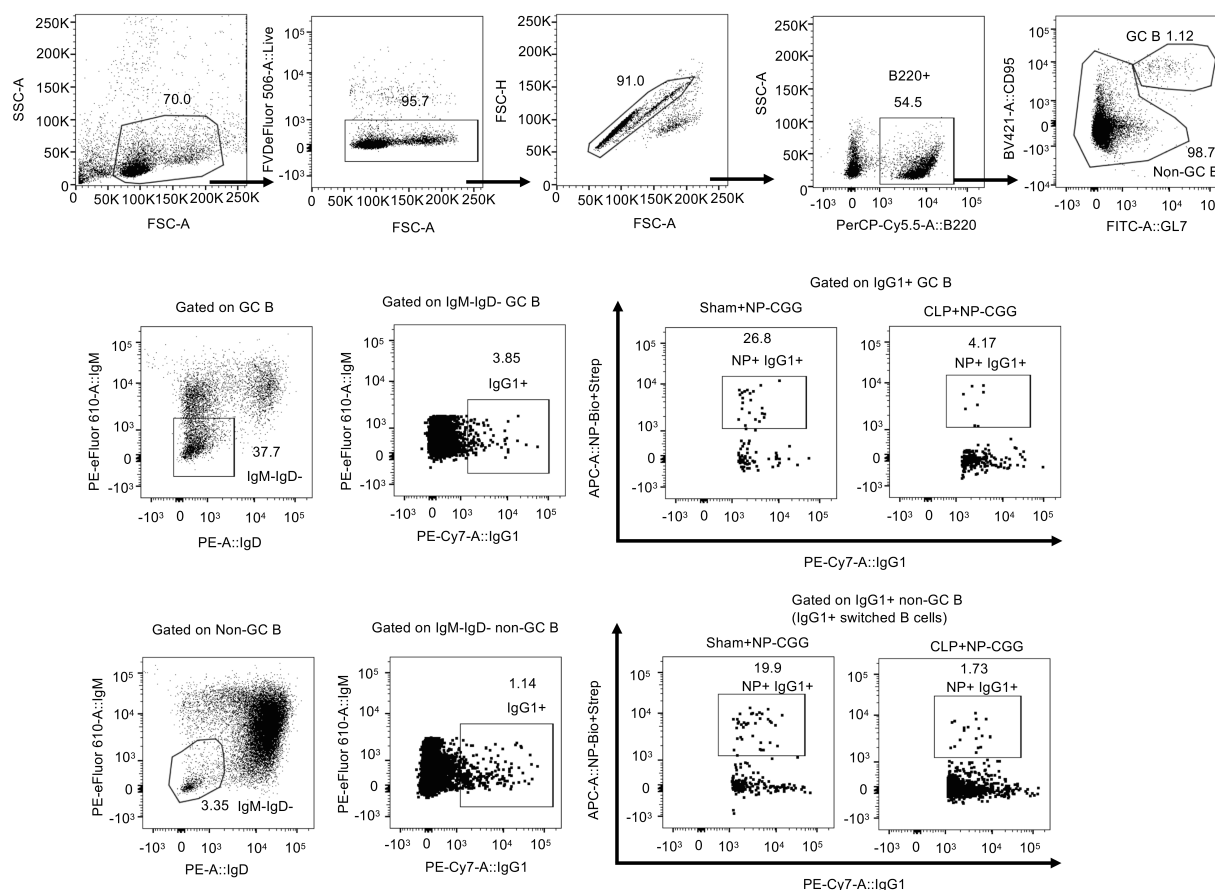

**Supplementary Figure 2. Gating strategy for germinal-center (GC) and Non-GC (memory) B cells.** Sham-operated or CLP mice were immunized with a single i.p. injection of NP-CGG (100  $\mu$ g) in alum (100  $\mu$ L) four-weeks after surgery. At the time points indicated in results section, splenocytes isolated from immunized sham or CLP mice at different time points indicated in result were stained for CD95, GL7, IgM, IgD, IgG1 and NP, and analyzed by flow cytometry. Representative flow cytometry dot plots of splenocytes isolated from an immunized sham-operated mouse depicting gating strategy for NP-specific IgG1<sup>+</sup> GC and Non-GC (class-switched IgG1<sup>+</sup> memory) B cells.

### Supplementary Figure 3

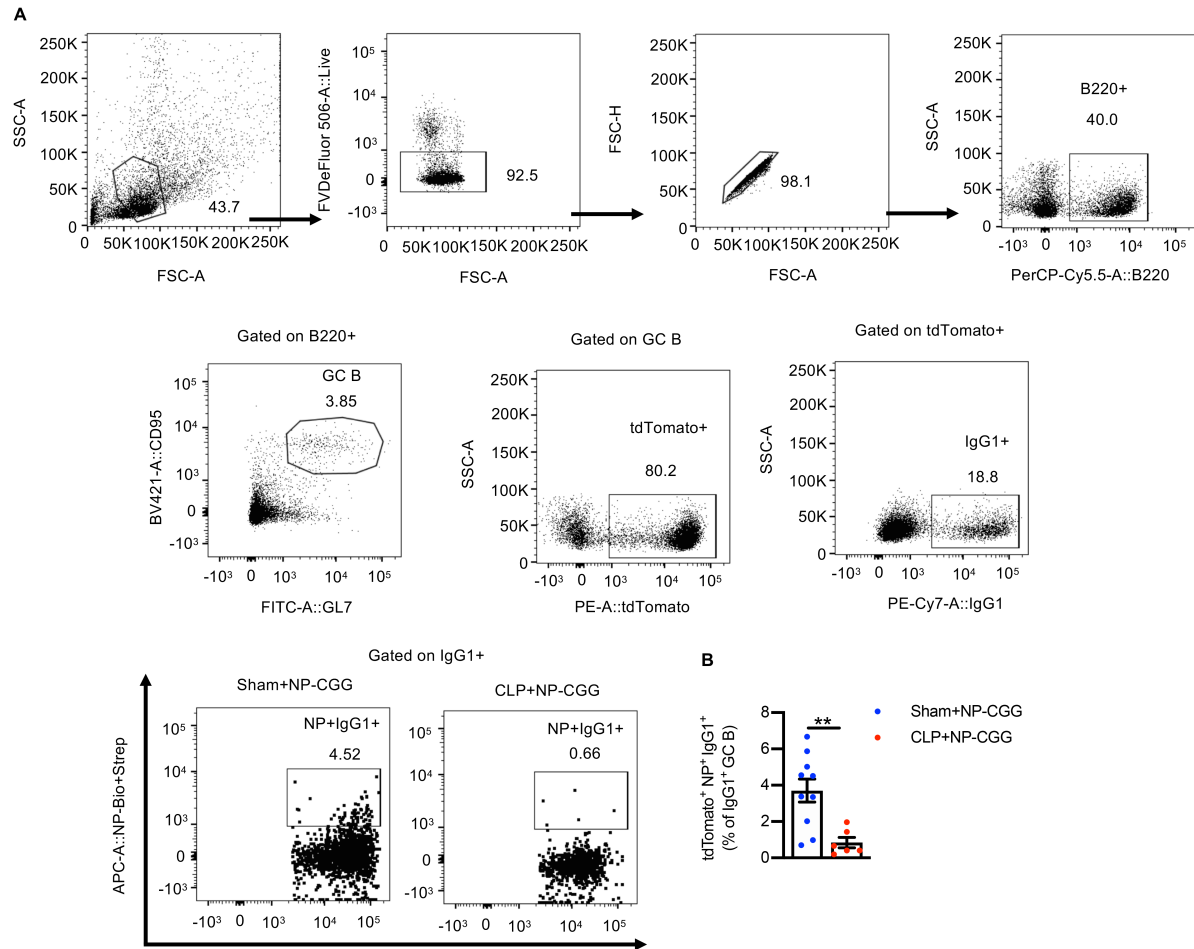

**Supplementary Figure 3. GC-dependent defect in an antigen-specific antibody response.** Sham or CLP surgery was performed in *Slpr2-ERT2cre-tdTomato* reporter mice. Four-weeks post-surgery mice were immunized with a single i.p. injection of NP-CGG (100  $\mu$ g) in alum (100  $\mu$ L) and tdTomato expression in these mice was induced by i.p. administration of 2 mg tamoxifen (Sigma) in 100  $\mu$ L of corn oil (Sigma) for three consecutive days (days 11-13; once per day) starting at day 11 after NP-CGG immunization. Splenocytes isolated from immunized sham or CLP mice on day 14 after immunization were stained for CD95, GL7, IgG1, NP, and analyzed by flow cytometry. **(A)** Representative flow cytometry dot plots of splenocytes isolated from an immunized sham mouse depicting gating strategy for GC-specific  $tdTomato^+$  NP $^+$  IgG1 $^+$  B cells. **(B)** Quantification of percentage of  $tdTomato^+$  NP $^+$  IgG1 $^+$  GC B in IgG1 $^+$  gate. Each dot represents an individual animal ( $n=10$ , Sham+NP-CGG;  $n=6$ , CLP+NP-CGG). Data represent mean  $\pm$  SEM from two independent experiments. Sham+NP-CGG vs. CLP+NP-CGG  $**P < 0.01$ . (Mann-Whitney U-test).



## Supplementary Figure 4

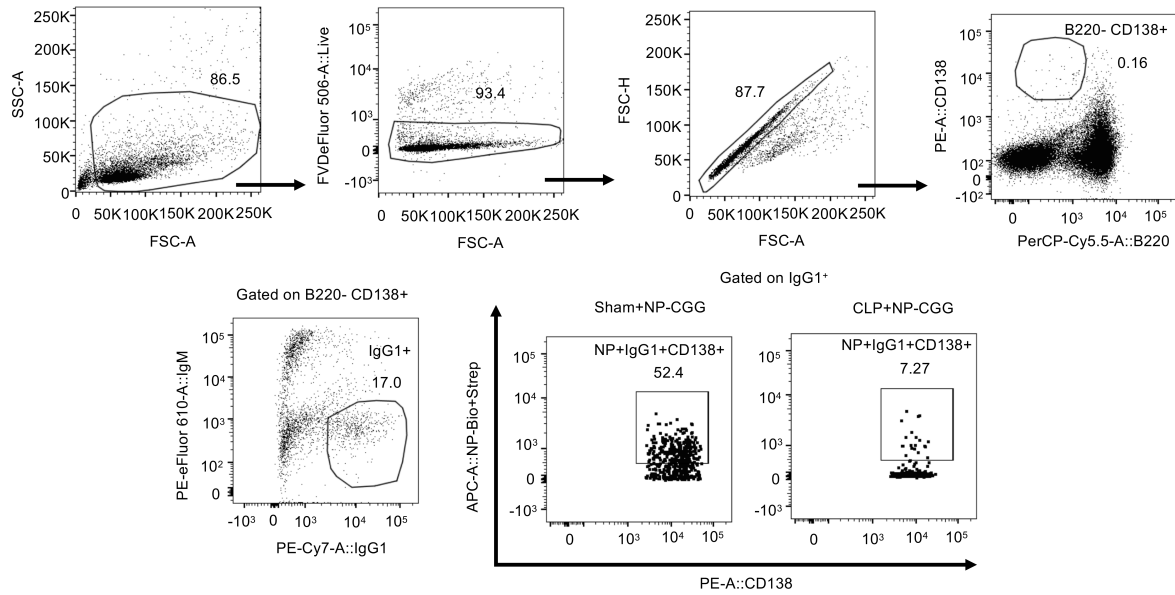

**Supplementary Figure 4. Gating strategy for plasma cells.** Sham or CLP mice were immunized with single i.p. injection of NP-CGG (100  $\mu$ g) in alum (100  $\mu$ L) four-weeks post-surgery. Splenocytes isolated from immunized sham or CLP mice at the time points indicated in result section were surface stained for B220 and CD138 and intracellularly stained for IgM, IgG1 and NP, and analyzed by flow cytometry. Representative flow cytometry dot plots of splenocytes isolated from an immunized sham mouse depicting gating strategy for NP-specific IgG1<sup>+</sup> CD138<sup>+</sup> PCs in IgG1<sup>+</sup> gate.

## Supplementary Figure 5

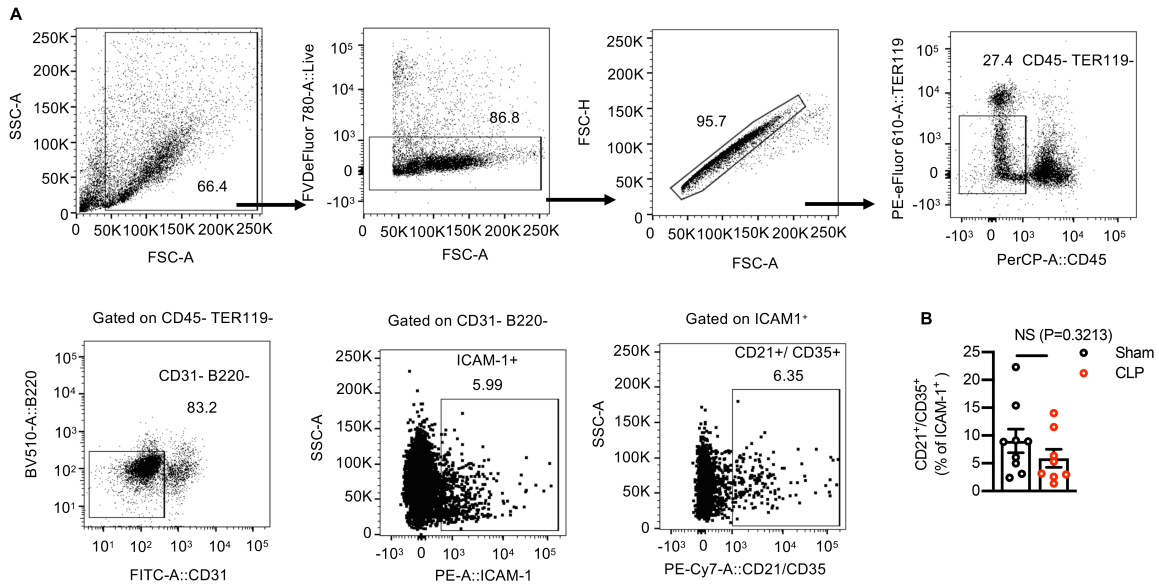

**Supplementary Figure 5. No significant change was observed in the frequency of FDCs in CLP mice compared to sham mice.** Sham or CLP mice were sacrificed at four-weeks post-surgery. After CD45<sup>+</sup> cells depletion by using anti-CD45 MACS microbeads, stromal cells were surface stained for CD45, TER119, B220, CD31, ICAM-1 and CD21/CD35 antibodies and analyzed by flow cytometry. **(A)** Representative flow cytometry dot plots of CD35<sup>+</sup> stromal cells isolated from a CLP mouse depicting gating strategy for FDC analyses. **(B)** Quantification of percentage of CD21<sup>+</sup>/CD35<sup>+</sup> cells in ICAM-1<sup>+</sup> gate. Each dot represents an individual animal (n=9, Sham; n=8, CLP). Data represent mean  $\pm$  SEM from two independent experiments. Sham vs. CLP NS, not significant. (Mann-Whitney U-test).

## Supplementary Figure 6

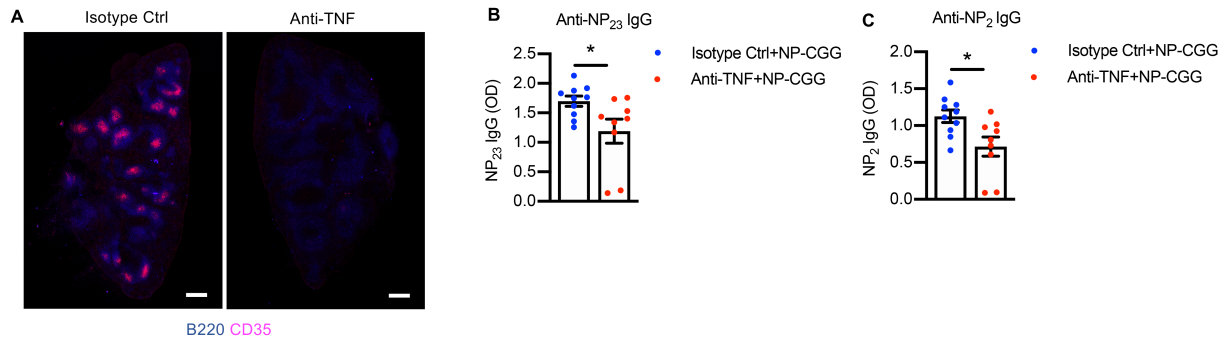

**Supplementary Figure 6. Inactivation of TNF results in loss of FDC clusters and an impaired antigen-specific humoral response.** Wild-type C57BL/6J mice were treated with anti-TNF antibody or isotype control (Ctrl) (250  $\mu$ g per mouse in 250  $\mu$ L PBS; i.p.) and immunized with NP-CGG (100  $\mu$ g) in alum (100  $\mu$ L), single, i.p. Mice were sacrificed at day 14 after immunization and serum and spleens were harvested. **(A)** Representative whole spleen sections from an isotype Ctrl and an anti-mouse TNF antibody-treated mouse stained for B220 and CD35. Whole spleen images were acquired by stitching tiled images. Magnification (20X; scale bar = 500  $\mu$ m). **(B)** Low-affinity anti-NP<sub>23</sub> IgG and **(C)** high-affinity anti-NP<sub>2</sub> IgG levels at day 14 post-immunization (n=10, Isotype Ctrl+NP-CGG; n=9, anti-TNF+NP-CGG). Each dot represents an individual animal. Data represent mean  $\pm$  SEM from two independent experiments. Isotype Ctrl+NP-CGG vs. anti-TNF+NP-CGG \* $P$  < 0.05 (Mann-Whitney U-test).

**Table. List of Reagents used in this study.**

| REAGENT or RESOURCE                                                                  | SOURCE                                    | IDENTIFIER       |
|--------------------------------------------------------------------------------------|-------------------------------------------|------------------|
| <b>Antibodies</b>                                                                    |                                           |                  |
| Goat anti-mouse IgG, Human ads-UNLB                                                  | Southern Biotech                          | Cat # 1030-01    |
| Goat anti-mouse IgG1, Human ads-AP                                                   | Southern Biotech                          | Cat # 1070-04    |
| Goat anti-mouse IgG, Human ads-AP                                                    | Southern Biotech                          | Cat # 1030-04    |
| Goat anti-mouse IgG2c, Human ads-AP                                                  | Southern Biotech                          | Cat # 1079-04    |
| Goat anti-mouse IgM, Human ads-AP                                                    | Southern Biotech                          | Cat # 1020-04    |
| Goat anti-mouse IgG, Human ads-BIOT                                                  | Southern Biotech                          | Cat # 1030-08    |
| BV421 Hamster Anti-Mouse CD95 (Clone: Jo2)                                           | BD Biosciences                            | Cat # 562633     |
| FITC Rat Anti-Mouse T- and B-Cell Activation Antigen (Clone: GL7)                    | BD Biosciences                            | Cat # 553666     |
| PE Rat Anti-Mouse IgD (Clone: 11-26c.2a)                                             | BD Biosciences                            | Cat # 558597     |
| PE Rat Anti-Mouse CD138 (Clone: 281-2)                                               | BD Biosciences                            | Cat # 553714     |
| PE/Cy7 anti-mouse IgG1 (Clone: RMG1-1)                                               | BioLegend                                 | Cat # 406614     |
| PerCP-Cy5.5 anti-Hu/Mo CD45R (B220) (Clone: RA3-6B2)                                 | Invitrogen/eBioscience/ Thermo Scientific | Cat # 45-0452-82 |
| PE-eFluor 610 Anti-Mo IgM (Clone: II/41)                                             | Invitrogen/eBioscience/ Thermo Scientific | Cat # 61-5790-82 |
| PerCP anti-mouse CD45 (Clone: 30-F11)                                                | BioLegend                                 | Cat # 103130     |
| PE/Cy7 anti-mouse CD21/CD35 (CR2/CR1) (Clone: 7E9)                                   | BioLegend                                 | Cat # 123419     |
| BV510 Rat Anti-mouse B220/ CD45R (Clone: RA3-6B2)                                    | BD Biosciences                            | Cat # 563103     |
| FITC Rat Anti-Mouse CD31 (Clone: MEC 13.3)                                           | BD Biosciences                            | Cat # 553372     |
| PE-eFluor 610-TER119 (Clone: TER-119)                                                | eBioscience/ Thermo Fisher Scientific     | Cat # 61-5921-82 |
| PE anti-mouse CD54 ICAM-1 (Clone: YN1/1.7.4)                                         | Invitrogen/eBioscience                    | Cat # 12-0541-81 |
| LEAF™ Purified anti-mouse TNF- $\alpha$ (Clone: MP6-XT22)                            | BioLegend                                 | Cat # 506325     |
| LEAF™ Purified Rat IgG1, $\kappa$ isotype Ctrl (Clone: RTK2071)                      | BioLegend                                 | Cat # 400427     |
| Biotin-conjugated rat anti-mouse CD35 (Clone: 8C12)                                  | BD Biosciences                            | Cat # 553816     |
| APC-conjugated hamster anti-mouse CD3e (Clone: 145-2C11)                             | BD Biosciences                            | Cat # 553066     |
| eFluor 450-conjugated rat anti-mouse B220 (Clone: RA3-6B2)                           | Invitrogen/Thermo Fisher Scientific       | Cat # 48-0452-82 |
| Purified rat anti mouse CD16/32 Fc block (Clone: 24. G2)                             | BD Biosciences                            | Cat # 553142     |
| <b>Chemicals, Peptides, and Recombinant Proteins</b>                                 |                                           |                  |
| 4-hydroxy-3-nitrophenyl) acetyl (NP) <sub>20</sub> -chicken $\gamma$ -globulin (CGG) | Biosearch Technologies                    | Cat # N-5055C    |
| CGG                                                                                  | Biosearch Technologies                    | Cat # C-1000     |
| NP-AECM-Ficoll                                                                       | Biosearch Technologies                    | Cat # F-1420     |
| Imject alum                                                                          | Thermo Scientific                         | Cat # 77161      |
| PBS                                                                                  | Corning                                   | Cat # 21-040-CV  |
| NP <sub>2</sub> -BSA                                                                 | Biosearch Technologies                    | Cat # N-5050L    |

|                                                                     |                                                  |                                                                                               |
|---------------------------------------------------------------------|--------------------------------------------------|-----------------------------------------------------------------------------------------------|
| NP <sub>23</sub> -BSA                                               | Biosearch Technologies                           | Cat # N-5050H                                                                                 |
| NP <sub>6</sub> -BSA-biotin                                         | Biosearch Technologies                           | Cat # N-1026                                                                                  |
| Phosphatase substrate                                               | Sigma                                            | Cat # S0942                                                                                   |
| Sodium Bicarbonate (NaHCO <sub>3</sub> )                            | Fisher Scientific                                | Cat # S233-3                                                                                  |
| Magnesium chloride (MgCl <sub>2</sub> )                             | Sigma                                            | Cat # M8266                                                                                   |
| 5-Bromo-4-chloro-3-indolyl phosphate p-toluidine salt (BCIP)        | Sigma                                            | Cat # B6777                                                                                   |
| Triton X                                                            | Sigma                                            | Cat # T8787                                                                                   |
| Tween 20                                                            | Fisher Scientific                                | Cat # BP337                                                                                   |
| Tamoxifen                                                           | Sigma                                            | Cat # T5648                                                                                   |
| Formalin solution 10%, neutral buffer                               | Sigma                                            | Cat # HT 5011                                                                                 |
| UltraPure 0.5 M Ethylene-diaminetetraacetic acid (EDTA), pH 8.0     | Invitrogen                                       | Cat # 15575-038                                                                               |
| HBSS (1X)                                                           | Gibco                                            | Cat # 14175-095                                                                               |
| Acetone                                                             | Fisher scientific                                | Cat # A18-4                                                                                   |
| 2-Mercaptoethanol 1000X                                             | Gibco/Life Technologies                          | Cat # 21985-023                                                                               |
| <b>Experimental Models: Organisms/Strains</b>                       |                                                  |                                                                                               |
| C57BL/6J                                                            | Jackson Laboratory                               | Stock no. 000664                                                                              |
| <i>Rag1</i> KO (B6.129S7- <i>Rag1</i> <sup>&lt;tm1Mom&gt;/J</sup> ) | Jackson Laboratory                               | Stock no. 002216                                                                              |
| <i>Rosa26</i> fl/fl tdtomato                                        | Jackson Laboratory                               | Stock no. 007914                                                                              |
| <i>Slpr2</i> -ERT2cre                                               | Tomohiro Kurosaki                                | Osaka University, Japan                                                                       |
| <b>Software and Algorithms</b>                                      |                                                  |                                                                                               |
| FlowJo software v10.6.1                                             | Tree Star                                        | <a href="https://www.flowjo.com/solutions/flowjo">https://www.flowjo.com/solutions/flowjo</a> |
| Graph Pad Prism v8.3.1                                              | Graph Pad Software, LLC                          | N/A                                                                                           |
| <b>Other</b>                                                        |                                                  |                                                                                               |
| Suture silk 4-0 C13                                                 | Fisher Scientific                                | Cat # NC9404551                                                                               |
| Suture, 6/0 27 PDS II VIO MONO TF                                   | Medline                                          | SKU # ETHZ432H                                                                                |
| Imipenem/Cilastatin                                                 | Fresenius kabi USA, LLC                          | N/A                                                                                           |
| 0.9% Sodium Chloride                                                | Fisher Scientific                                | Cat # NC9054335                                                                               |
| Bupivacaine HCL 0.5% injection                                      | North America Covetrus                           | SKU # 054893                                                                                  |
| Buprenex (buprenorphine HCL) injection, 0.3mg/ml, c3                | North America Covetrus                           | SKU # 055175                                                                                  |
| Braintree Scientific 9 MM EZ CLIPS 1000/CS                          | Fisher Scientific                                | Cat # NC9281117                                                                               |
| Isoflurane, USP                                                     | North America Covetrus                           | SKU # 029405                                                                                  |
| Half-area 96-well flat bottom plates                                | Corning                                          | Cat # 3690                                                                                    |
| Immulon 4HBX plates                                                 | Thermo Scientific                                | Cat # 3855                                                                                    |
| Streptavidin-AP                                                     | Southern Biotech                                 | Cat # 7105-04                                                                                 |
| Fixable Viability Dye eFluor™ 780                                   | Invitrogen/eBioscience /Thermo Fisher Scientific | Cat # 65-0865-18                                                                              |
| Streptavidin, Alexa Flour 568 Conjugate                             | Fisher                                           | Cat # S112266A                                                                                |
| Streptavidin, Alexa Fluor™ 488 Conjugate                            | Thermoscientific Fisher                          | Cat # S32354                                                                                  |

|                                                                  |                                                     |                   |
|------------------------------------------------------------------|-----------------------------------------------------|-------------------|
| Streptavidin APC crosslinked Conjugate                           | Thermoscientific Fisher                             | Cat # S868        |
| Fixable Viability Dye eFluor™ 506                                | Invitrogen/eBioscience/<br>Thermo Fisher Scientific | Cat # 65-0866-14  |
| RBC lysis buffer 10X                                             | BioLegend                                           | Cat # 420301      |
| DMEM/High glucose                                                | Sigma                                               | Cat # D5796       |
| EasySep Buffer                                                   | Stem Cell Technologies                              | Cat # 20144       |
| CD45 MicroBeads, mouse                                           | Miltenyi Biotec                                     | Cat # 130-052-301 |
| LS Columns                                                       | Miltenyi Biotec                                     | Cat # 130-042-401 |
| Anti-fade Mounting Medium                                        | Vector Labs                                         | Cat # H-1000      |
| Collagenase D                                                    | Sigma/Roche                                         | Cat # 11088858001 |
| EasySep Mouse Pan-B Cell Isolation kit                           | Stem Cell Technologies                              | Cat # 19844       |
| EasySep Mouse CD4+ T Cell Isolation Kit                          | Stem Cell Technologies                              | Cat # 19852A      |
| B-Phycoerythrin Antibody Rabbit Polyclonal                       | Rockland<br>Immunochemicals                         | Cat # 200-401-099 |
| B-Phycoerythrin                                                  | Thermo Fisher/<br>Invitrogen                        | Cat # P800        |
| Directzol RNA micro 200 prep                                     | Zymo Research                                       | Cat # R2062       |
| Dispase II (neutral protease, grade II)                          | Sigma/Roche                                         | Cat # 4942078001  |
| DNase I                                                          | Sigma/Roche                                         | Cat # 11284932001 |
| eBioscience™ Foxp3 / Transcription Factor<br>Staining Buffer Set | eBioscience                                         | Cat # 00-5523-00  |
| Pre-Amp Master Mix (2x)                                          | Thermo Fisher Scientific                            | Cat # 4391128     |
| MACS BSA stock solution                                          | Miltenyi Biotec                                     | Cat # 130-091-376 |
| Sodium Pyruvate (100 mM)                                         | Gibco/Life Technologies                             | Cat # 11360-070   |
| HEPES (1 M)                                                      | Gibco/Life Technologies                             | Cat # 15630-080   |
| Penicillin-Streptomycin Solution                                 | HyClone                                             | Cat # SH40003-12  |
| Auto MACS Rinsing Solution                                       | Miltenyi Biotec                                     | Cat # 130-091-222 |
| Fetal Bovine Serum                                               | HyClone                                             | Cat# SH30910.03   |
| Bovine Serum Albumin Fraction V                                  | Roche                                               | Cat # 10735108001 |
| iScript cDNA Synthesis kit                                       | BioRad                                              | Cat # 170-8891    |
| Tissue-tek cryo-OCT compound                                     | Fisher Health Care                                  | Cat # 14-373-65   |
| Corn oil                                                         | Sigma                                               | Cat # C8267       |
| Normal Goat Serum (ab7481)                                       | Abcam                                               | Cat # ab7481      |
| TRIzol reagent                                                   | Life Technologies                                   | Cat # 15596018    |
| RPMI                                                             | Gibco/Life Technologies                             | Cat # 11875119    |
| LightCycler 480 Probes Master                                    | Roche                                               | Cat # 04887301001 |
| Cell strainer 100 µm                                             | Fisher                                              | Cat # 22-363-549  |
| Difco Agar, Granulated                                           | BD                                                  | Cat # 214530      |
| BBL Brain Heart Infusion                                         | BD                                                  | Cat # 211059      |
